# Supplementary material for: Elucidating the role of the nanostructure in protein aerogels for removal of organic water pollutants
Source: Royal Society of Chemistry journal article supplement (doi:10.1039/d4su00352g), 2024-01-01
Supplement: d4su00352g1.pdf [file d4su00352g1.pdf]

## SUPPLEMENTARY INFORMATION

### **Elucidating the role of the nanostructure in protein aerogels for removal of organic water pollutants**

*Rodrigo Sanches Pires<sup>1</sup>, Antonio J. Capezza<sup>2</sup>, David Jonsson<sup>1</sup>, Jessica Lyrner Morén<sup>1</sup>, Mikael S. Hedenqvist<sup>2</sup>, Christofer Lendel<sup>1\*</sup>*

<sup>1</sup> Department of Chemistry, KTH Royal Institute of Technology, Teknikringen 30, SE-100 44, Stockholm, Sweden.

<sup>2</sup> Department of Fibre and Polymer Technology, KTH Royal Institute of Technology, Teknikringen 56-58, SE-100 44, Stockholm, Sweden.

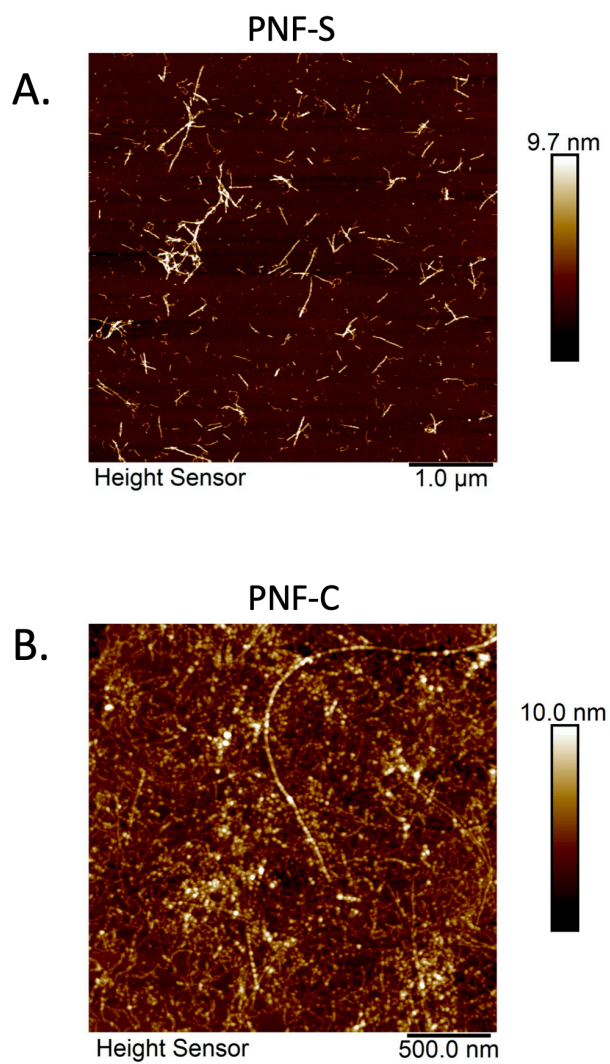

**Figure S1.** AFM micrographs illustrating the morphologies of the fibrils forming the PNF-S (A) and PNF-C (B) hydrogels.

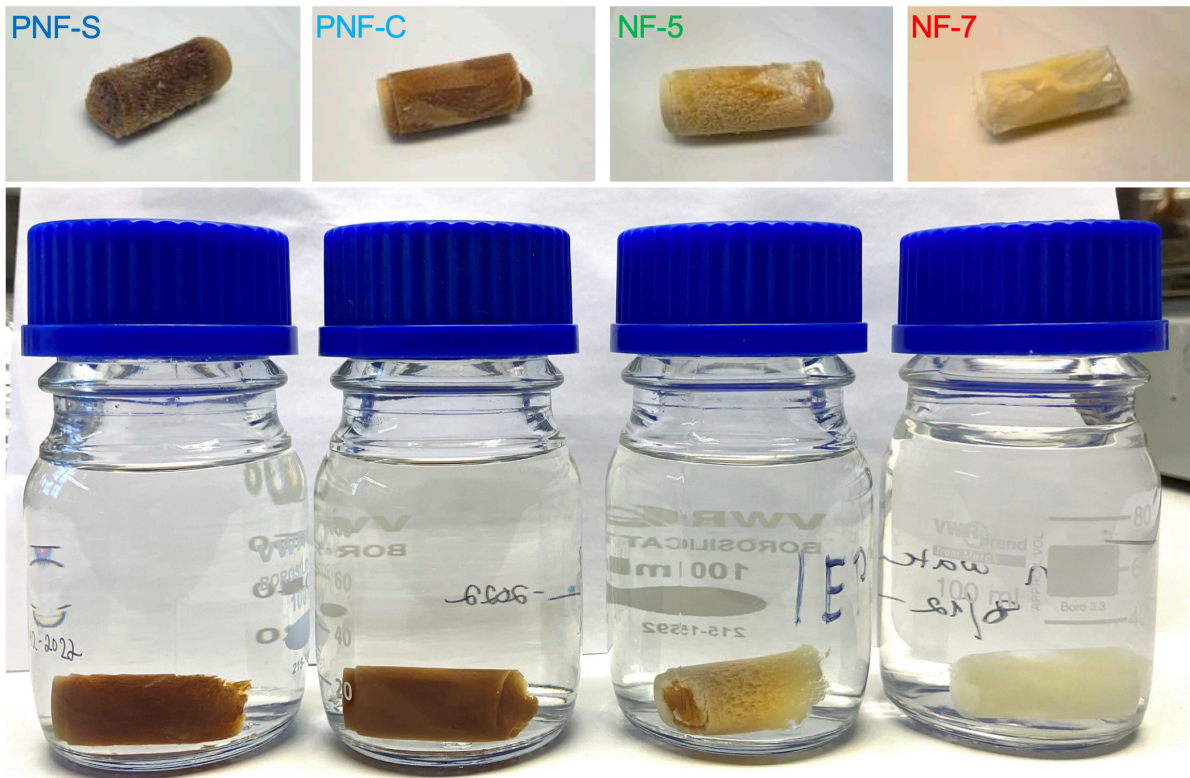

**Figure S2.** Photos of the four materials investigated in this study *PNF-S*: PNF aerogels from straight seeds. *PNF-C*: PNF aerogels from curved seeds. *NF-5*: Non-fibrillar particulate gels formed at the isoelectric point. *NF-7*: Non-fibrillar aerogels formed under reducing conditions at neutral pH. The top row shows the dry aerogels and the bottom row the same materials submerged in water for 70 days.

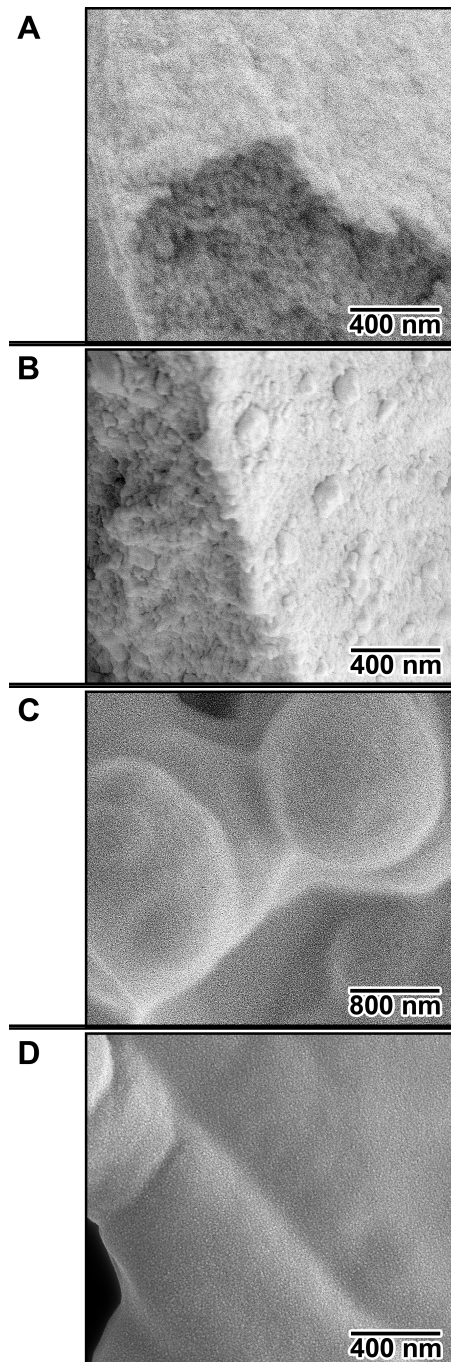

**Figure S3.** SEM images of the cell walls of the four classes of aerogels. **A.** PNF-S aerogel from straight seeds. **B.** PNF-C aerogel from curved seeds. **C.** NF-5 aerogel formed at the isoelectric point. **D.** NF-7 aerogel formed at neutral pH under reducing conditions.
